# Supplementary material
Source: Royal Society of Chemistry journal article supplement (doi:10.1039/d6ay00372a)
Supplement: d6ay00372a1.pdf [file d6ay00372a1.pdf]

## Supporting Information

### **Innovative multispectral sensor for rapid wine adulteration detection using wavelength selection algorithms**

Chengbo Yang<sup>a,b\*</sup>, Wanqiang Pan<sup>a</sup>, Song Zhang<sup>c</sup>, Linxi Xu<sup>a</sup>, Haofei Wang<sup>a,b</sup>, Zhiliang Zhao<sup>a,b</sup>

<sup>a</sup> School of Aeronautics, Astronautics and Intelligent Equipment, Xihua University, Chengdu 610039

<sup>b</sup> Intelligent sensing and high speed computing research center, Xihua University, Chengdu 610039, China.

<sup>c</sup> School of Electrical Engineering and Electronic Information, Xihua University, Chengdu 610039, China

\*Corresponding author: 18408212738@163.com

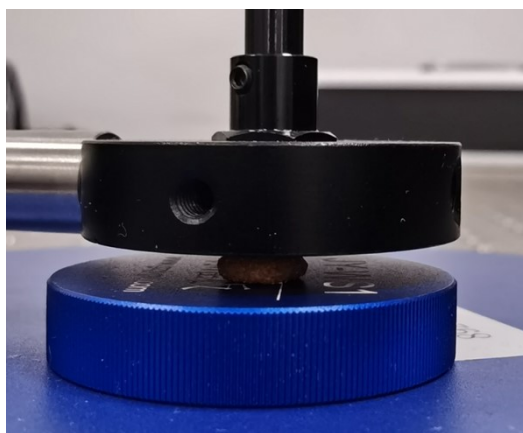

**Figure S1** Pet food spectrum acquisition process with the customized reflective sample holder.

**Table S1** Basic information and guaranteed nutritional composition of the four brands of pet food samples.

| Sample | Brand       | E-commerce | Guaranteed Nutritional Composition |      |       |      |          |        |         |
|--------|-------------|------------|------------------------------------|------|-------|------|----------|--------|---------|
|        |             |            | Protein                            | Fat  | Fiber | Ash  | Moisture | Ca     | Taurine |
| A      | MeiYangYang | Taobao     | ≥30%                               | ≥13% | ≤5%   | ≤10% | ≤10%     | ≥1.2%  | ≥0.15%  |
| B      | NuoBiLi     | Taobao     | ≥42%                               | ≥18% | ≤5%   | ≤10% | ≤10%     | ≥0.1%  | ≥0.2%   |
| C      | Unbranded   | Taobao     | -                                  | -    | -     | -    | -        | -      | -       |
| D      | AiSaKe      | Taobao     | ≥28%                               | ≥10% | ≤9%   | ≤10% | ≤10%     | ≥1.25% | ≥0.1%   |

- Sample C is an unbranded low-end pet food product without fixed packaging and official guaranteed nutritional composition labeling, so the relevant data is not available.

**Table S2** Parameter optimization range and final optimized key settings of the RF model.

| Parameter Name | Grid Search Optimization Range                       | Final Optimized Setting |
|----------------|------------------------------------------------------|-------------------------|
| n_estimators   | 10, 20, 50, 70, 100, 120, 170,<br>200, 300, 500, 800 | 800                     |
| criterion      | "gini", "entropy"                                    | entropy                 |
| max_depth      | 5, 8, 15, 25, 30                                     | 8                       |
| random_state   | 1                                                    | 1                       |

- The RF model was built based on the scikit-learn library in Python, and hyperparameter optimization was performed via 5-fold cross-validation combined with grid search.

**Table S3** Performance comparison of different mainstream classification models under full-spectrum.

| Model | Train   | Test   |
|-------|---------|--------|
| KNN   | 84.15%  | 89.77% |
| SVM   | 70.94%  | 72.73% |
| RF    | 100.00% | 92.05% |
